# Supplementary material for: Chromatographic assay to study the activity of multiple enzymes involved in the synthesis and metabolism of dopamine and serotonin
Source: Royal Society of Chemistry journal article supplement (doi:10.1039/c2an16227j), 2012-01-01
Supplement: c2an16227j.pdf [file c2an16227j.pdf]

**SUPPLEMENTARY FIGURE 1.** Figure 1 shows a quasi-steady state hydrodynamic voltammogram ( $100 \text{ mV s}^{-1}$  scan rate) of all the neurochemicals of interest ( $50 \text{ }\mu\text{M}$ ) within the assay within a potential range of 0 to  $+1.0 \text{ V}$ , obtained using a glassy carbon electrode and a flow rate of  $1 \text{ mL min}^{-1}$ . For the majority of the neurochemicals, oxidation at diffusion-limiting rates occurs at a potential around  $+700 \text{ mV}$ , however DOPAC, tyrosine and tryptophan require a greater potential to achieve steady-state current responses. For this reason, a potential of  $+850 \text{ mV vs. Ag|AgCl}$  reference electrode was chosen as the detection potential for the chromatographic assay. Of the analytes assessed, tryptophan had the greatest oxidation current.

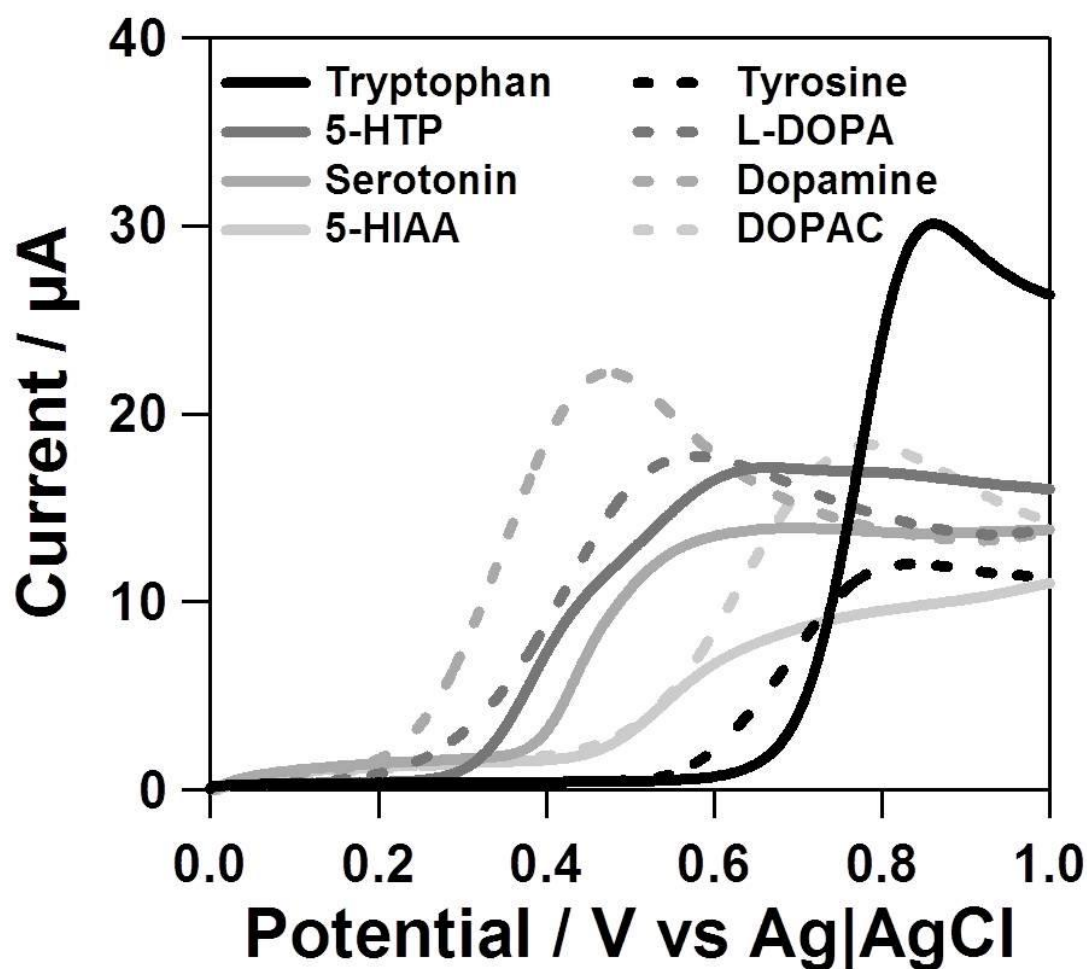

**SUPPLEMENTARY FIGURE 2.** Effect of sample splitting on the levels of neurochemicals. (A) Chromatographic response of a sample split into two and in (B), the ratio of the two sample splits are shown (n=4). No significant difference was observed in the levels of all neurochemicals between the sample splits. Responses shown as median values with error bars indicative of 25 – 75 % ranges. All conditions are similar to those in Figure 1C. **Solutes:** 1 – L-DOPA; 2 – tyrosine; 3 – DA; 4 – 5-HTP; 5 – 5-HT; 6 – DOPAC; 7 – tryptophan and 8 – 5-HIAA.

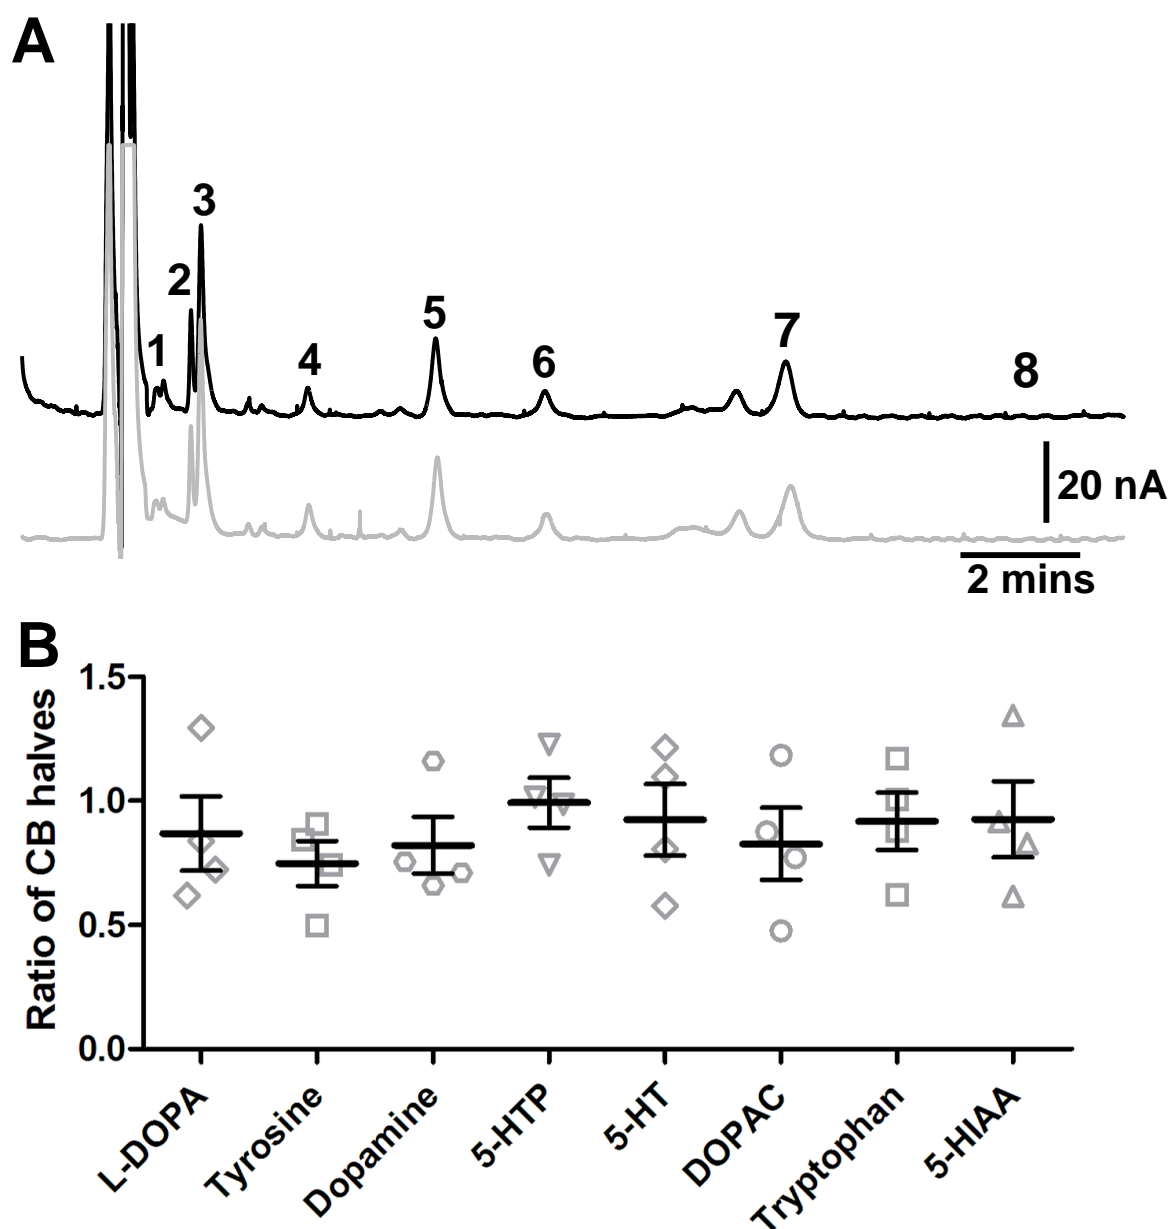

**SUPPLEMENTARY TABLE 1.** Supplementary Table 1 shows the calibration range of the analyte of choice, the limit of detection (LOD, based on the 3 standard deviations of the y intercept using least-squares regression) and the correlation coefficient ( $R^2$ ). All conditions are similar to those in Figure 2C.

| <b>Standard</b> | <b>Calibration range<br/>(<math>\mu\text{M}</math>)</b> | <b><math>R^2</math></b> | <b>Limit of detection<br/>(nM)</b> |
|-----------------|---------------------------------------------------------|-------------------------|------------------------------------|
| L-DOPA          | 0.01 – 5                                                | 0.992                   | 24                                 |
| Tyrosine        | 1 – 100                                                 | 0.996                   | 1120                               |
| DA              | 0.1 – 5                                                 | 0.993                   | 67                                 |
| 5-HTP           | 0.01 – 5                                                | 0.991                   | 20                                 |
| 5-HT            | 0.1 – 5                                                 | 0.992                   | 98                                 |
| DOPAC           | 0.01 – 5                                                | 0.990                   | 35                                 |
| Tryptophan      | 1 – 100                                                 | 0.993                   | 1240                               |
| 5-HIAA          | 0.01 – 5                                                | 0.989                   | 29                                 |
